# Supplementary material for: Dopamine regulates termite soldier differentiation through trophallactic behaviours
Source: PubMed Central journal article supplement (PMC4785978; doi:10.1098/rsos.150574), 2016-02-10
Supplement: rsos150574supp1.pdf [file rsos150574supp1.pdf]

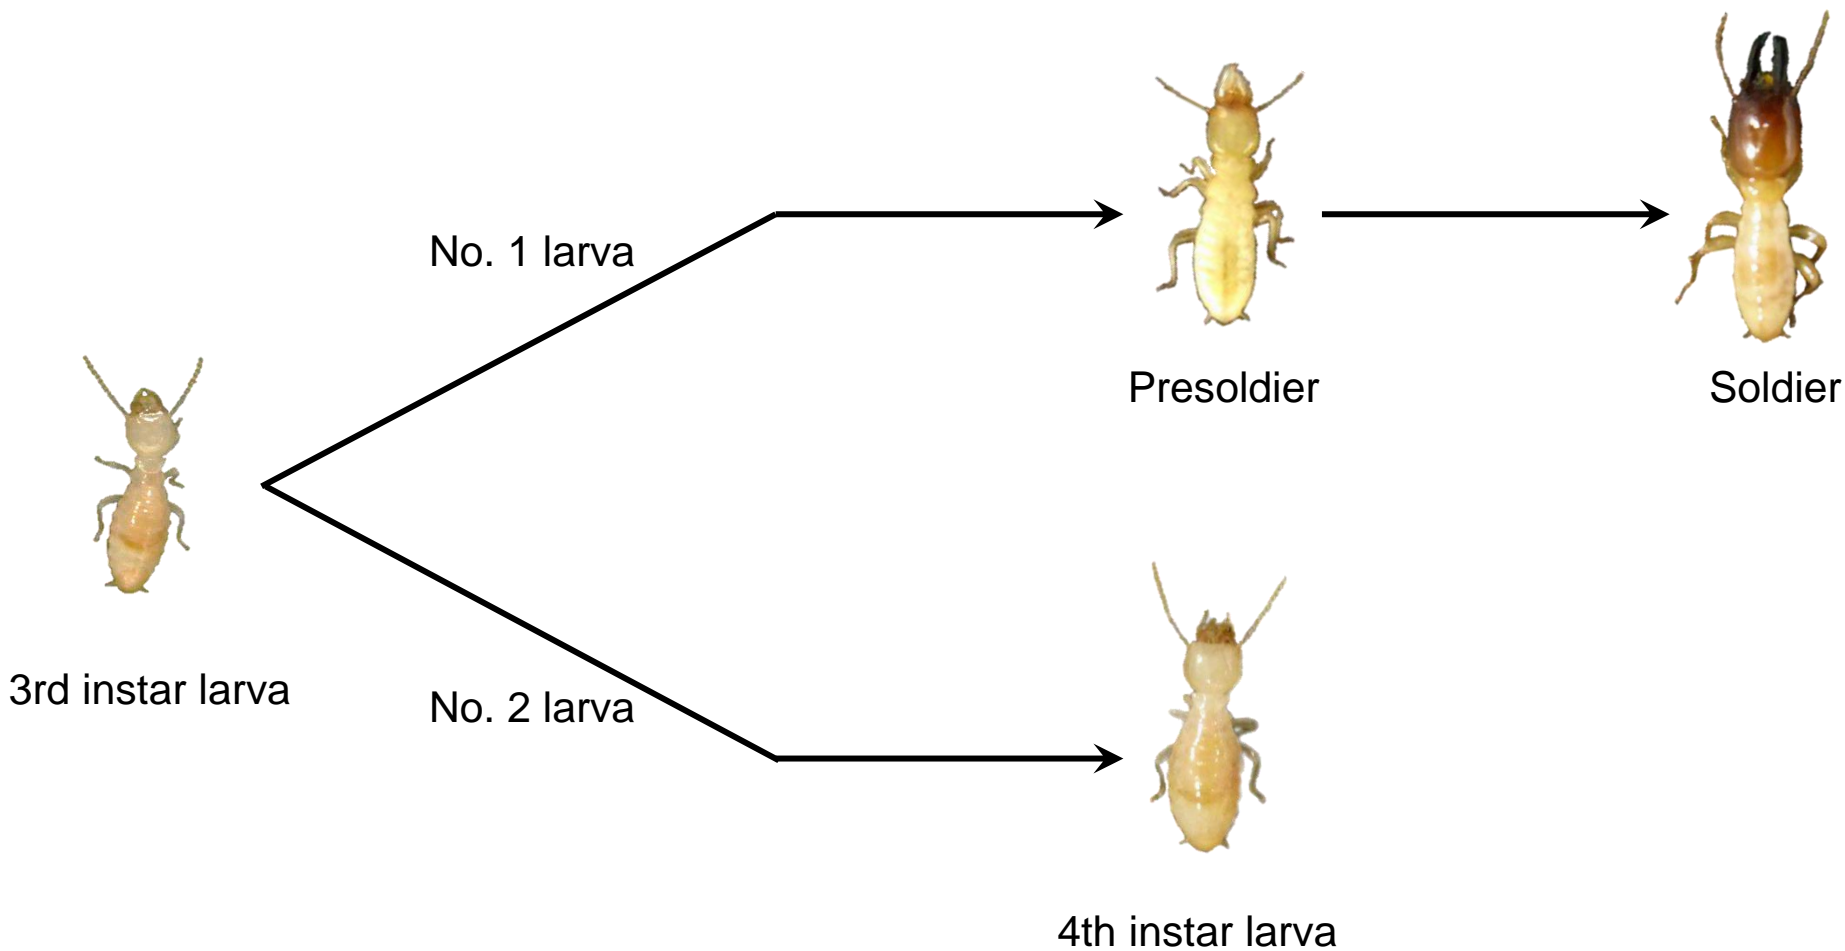

Figure S1

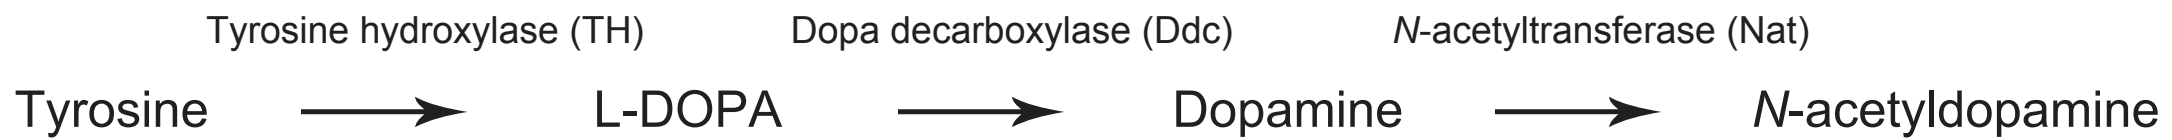

Figure S2

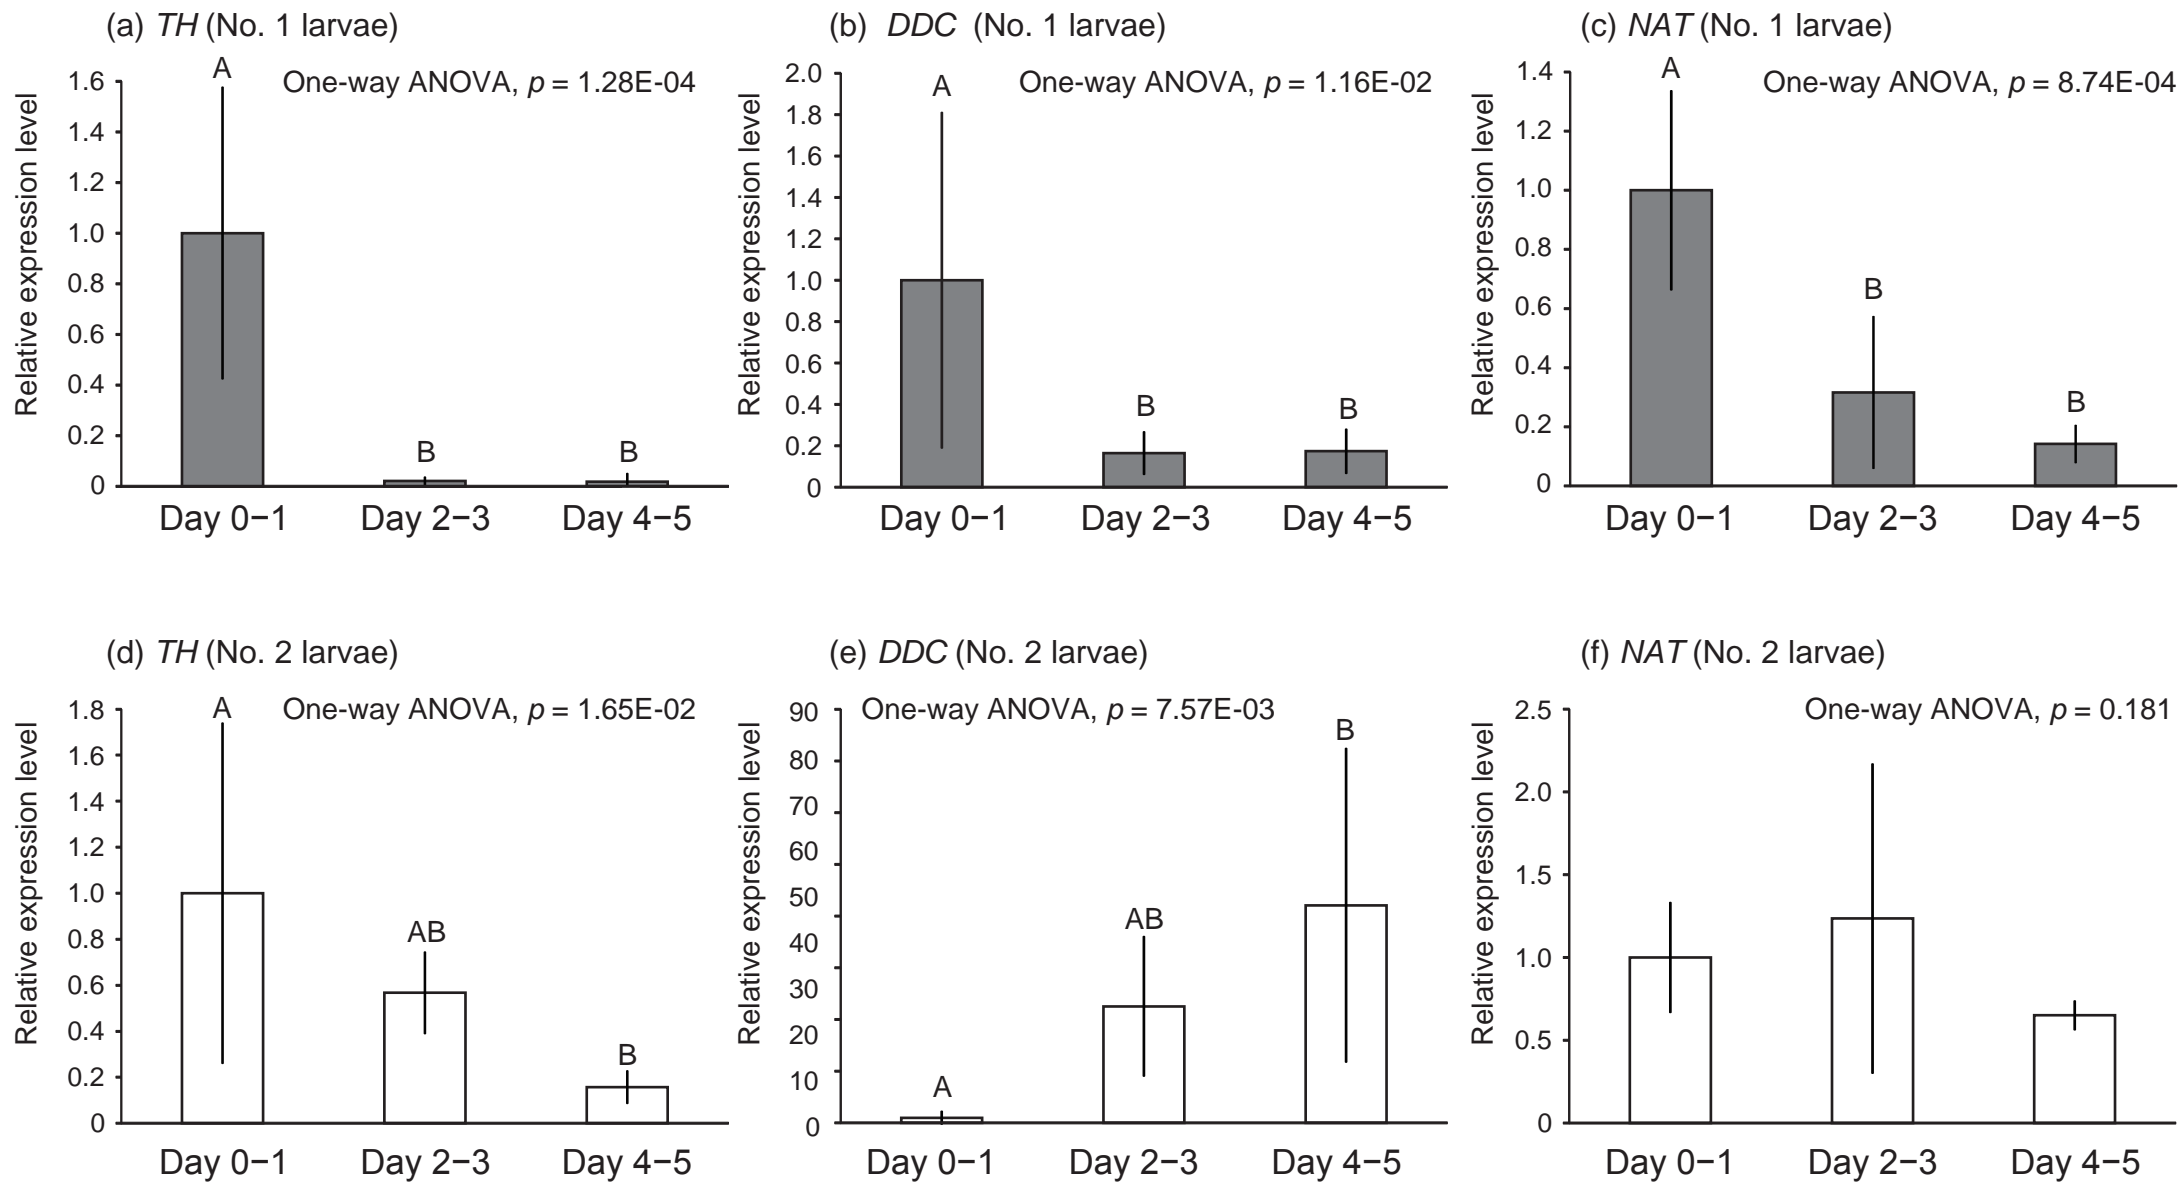

Figure S3

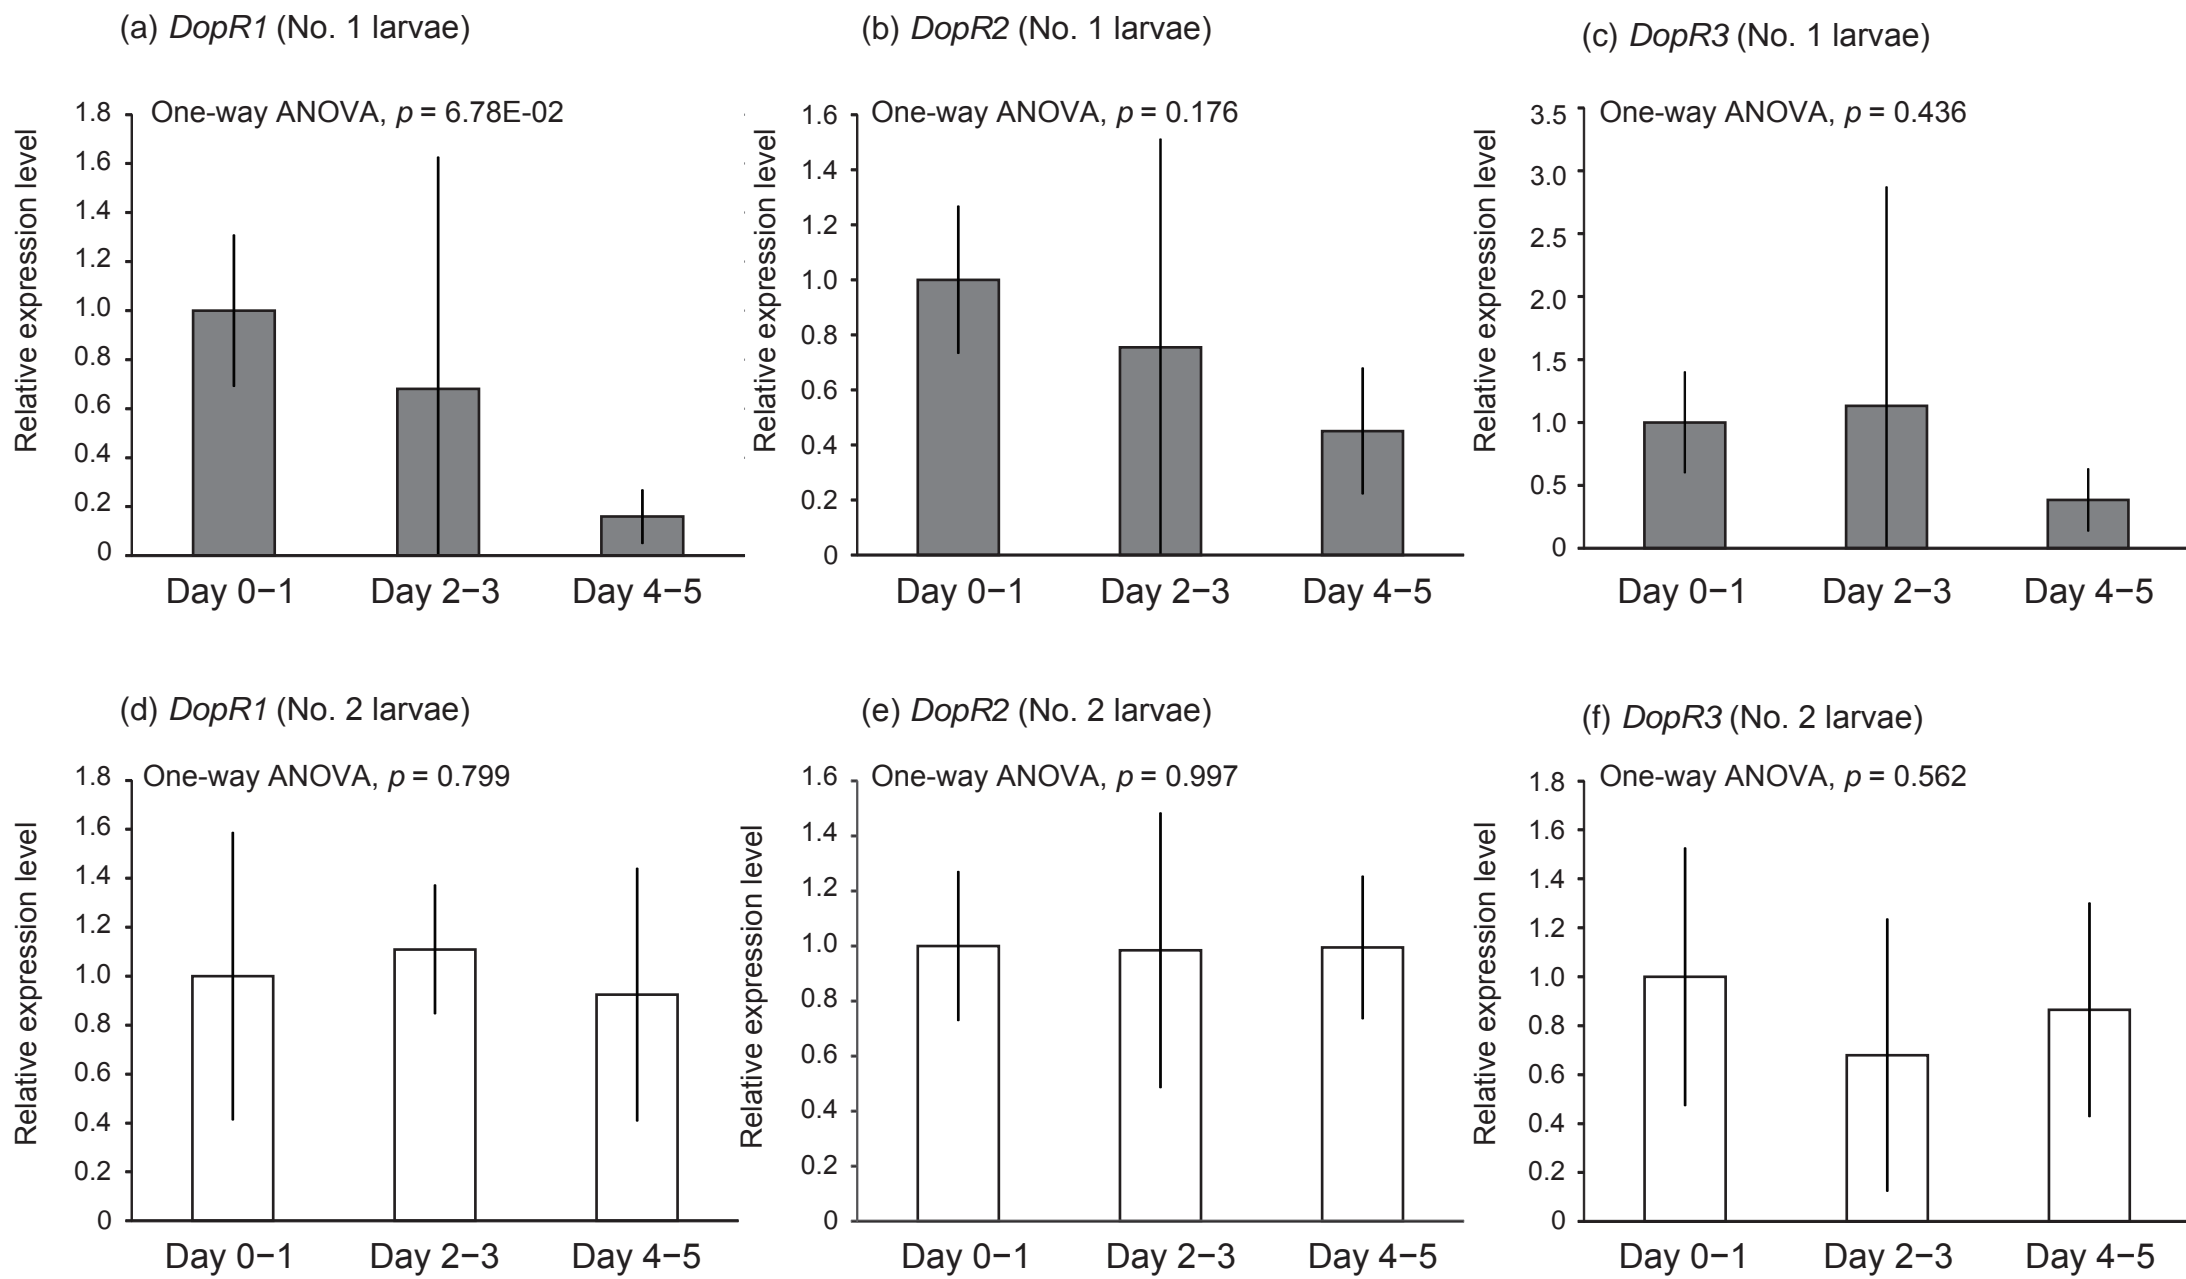

Figure S4

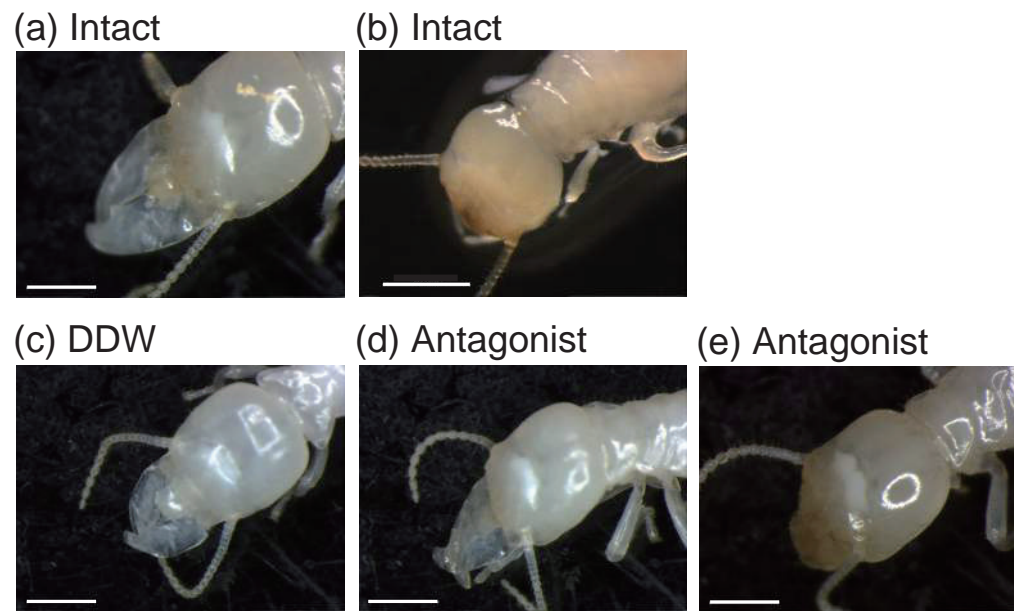

Figure S5

(a) Proctodeal trophallaxis  
from a male reproductive (king)

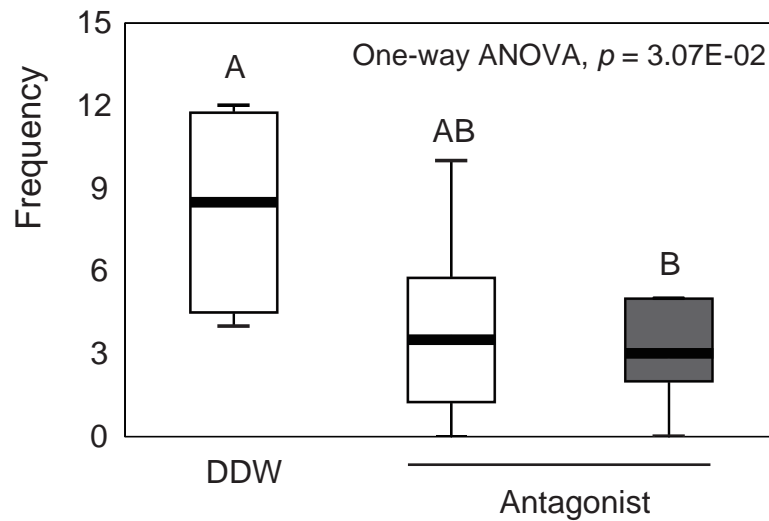

(b) Proctodeal trophallaxis  
from a female reproductive (queen)

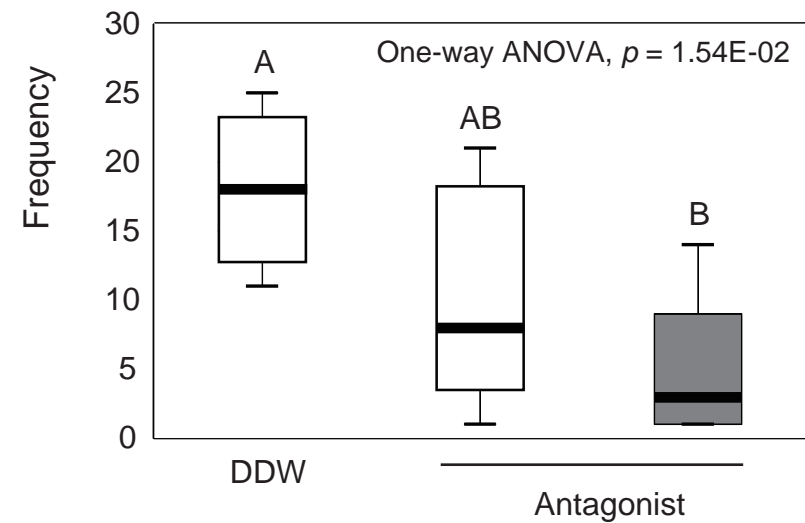

- Differentiated into presoldier
- Moulded into 4th instar

Figure S6
